# Supplementary material
Source: Elsevier journal article supplement (https://www.sciencedirect.com/science/article/pii/S113432301500023X)
Supplement: mmc1 [file S113432301500023X:mmc1.pdf]

## CUESTIONARIO DE EVALUACIÓN DE LA SATISFACCIÓN DEL PACIENTE CON EL USO DEL GLUCÓMETRO (SATIGLU)

A continuación tiene una serie de afirmaciones sobre las características del glucómetro y su utilización para medir la glucosa en sangre. Necesitamos saber si está o no de acuerdo con cada una de estas afirmaciones, para así conocer su grado de satisfacción con el glucómetro que está utilizando actualmente. Para nosotros tiene un gran valor conocer su opinión personal sobre todas estas cuestiones.

Por favor, rodee con un círculo el número que mejor refleje su opinión. Marque sólo un número en cada afirmación y no deje ninguno en blanco. Si se equivoca o quiere corregir una respuesta, por favor tache la que desea borrar y rodee con un círculo la que desea dejar marcada.

|   | UTILIZAR EL GLUCÓMETRO...                                                       | Totalmente en desacuerdo | En desacuerdo | Neutral | De acuerdo | Totalmente de acuerdo |
|---|---------------------------------------------------------------------------------|--------------------------|---------------|---------|------------|-----------------------|
| 1 | ...me da seguridad para poder tomar decisiones relacionadas con mi diabetes.    | 1                        | 2             | 3       | 4          | 5                     |
| 2 | ...me ha ayudado a saber cómo tratar mejor las bajadas de azúcar.               | 1                        | 2             | 3       | 4          | 5                     |
| 3 | ...me ayuda a prevenir problemas.                                               | 1                        | 2             | 3       | 4          | 5                     |
| 4 | ...me ayuda a conocer cómo afectan los hábitos cotidianos a mi nivel de azúcar. | 1                        | 2             | 3       | 4          | 5                     |
| 5 | ...me ayuda a ajustar las dosis de insulina.                                    | 1                        | 2             | 3       | 4          | 5                     |
| 6 | ...me ha ayudado a saber cómo tratar las subidas de azúcar.                     | 1                        | 2             | 3       | 4          | 5                     |
| 7 | ...me permite conocer el nivel de mi azúcar cuando pienso que tengo una bajada. | 1                        | 2             | 3       | 4          | 5                     |
| 8 | ...me resulta fácil porque no requiere codificación.                            | 1                        | 2             | 3       | 4          | 5                     |
| 9 | ...es sencillo (apenas requiere instrucción).                                   | 1                        | 2             | 3       | 4          | 5                     |

|    | EL GLUCÓMETRO...                                                             | Totalmente en desacuerdo | En desacuerdo | Neutral | De acuerdo | Totalmente de acuerdo |
|----|------------------------------------------------------------------------------|--------------------------|---------------|---------|------------|-----------------------|
| 10 | ...tiene unas instrucciones por escrito difíciles de entender.               | 1                        | 2             | 3       | 4          | 5                     |
| 11 | ...da demasiados mensajes de error.                                          | 1                        | 2             | 3       | 4          | 5                     |
| 12 | ...necesita mucha cantidad de sangre.                                        | 1                        | 2             | 3       | 4          | 5                     |
| 13 | ...tarda mucho tiempo en dar el resultado.                                   | 1                        | 2             | 3       | 4          | 5                     |
| 14 | ...tiene una memoria que permite guardar gran cantidad de datos de glucemia. | 1                        | 2             | 3       | 4          | 5                     |
| 15 | ...tiene un tamaño adecuado.                                                 | 1                        | 2             | 3       | 4          | 5                     |

|    |                                                                                                                      | Totalmente en desacuerdo | En desacuerdo | Neutral | De acuerdo | Totalmente de acuerdo |
|----|----------------------------------------------------------------------------------------------------------------------|--------------------------|---------------|---------|------------|-----------------------|
| 16 | Me fío de las mediciones de los niveles de azúcar.                                                                   | 1                        | 2             | 3       | 4          | 5                     |
| 17 | La conexión con el ordenador u otros dispositivos me ayuda al mejor control de mi enfermedad.                        | 1                        | 2             | 3       | 4          | 5                     |
| 18 | El envío de datos por Internet desde el dispositivo es sencillo.                                                     | 1                        | 2             | 3       | 4          | 5                     |
| 19 | La introducción de la tira en el dispositivo es fácil de hacer.                                                      | 1                        | 2             | 3       | 4          | 5                     |
| 20 | El programa informático que incorpora el glucómetro es de gran ayuda para manejar resultados (curvas, consejos,...). | 1                        | 2             | 3       | 4          | 5                     |
| 21 | Los números que aparecen en la pantalla se ven claramente.                                                           | 1                        | 2             | 3       | 4          | 5                     |
| 22 | Los accesorios del glucómetro (funda, pinchador, lancetas) son detalles importantes a considerar.                    | 1                        | 2             | 3       | 4          | 5                     |
| 23 | El pinchador usa lancetas estándar.                                                                                  | 1                        | 2             | 3       | 4          | 5                     |
| 24 | Es fácil de modificar la fecha y la hora.                                                                            | 1                        | 2             | 3       | 4          | 5                     |
| 25 | La calidad del pinchador es adecuada.                                                                                | 1                        | 2             | 3       | 4          | 5                     |

**¡MUCHAS GRACIAS POR SU RESPUESTA!**
